# Supplementary material for: Overexpressing lncRNA LAIR increases grain yield and regulates neighbouring gene cluster expression in rice
Source: PubMed Central journal article supplement (PMC6115402; doi:10.1038/s41467-018-05829-7), 2018-08-29
Supplement: 41467_2018_5829_MOESM3_ESM.pdf [file 41467_2018_5829_MOESM3_ESM.pdf]

## **Descriptions of Additional Supplementary Files**

File Name: Supplementary Data 1

Description: Primers used in this work
